# Supplementary material for: Comparison of Growth Performance and Plasma Metabolomics between Two Sire-Breeds of Pigs in China
Source: MDPI journal article supplement (doi:10.3390/genes14091706), 2023-08-27
Supplement: s1 [file s1]

**Table S1** Partial differential plasma metabolites in PY and Duroc (DD vs PY).

| Order Number | Name                                    | Molecular Weight | KEGG_ID | FC   | <i>p</i> -value | VIP  |
|--------------|-----------------------------------------|------------------|---------|------|-----------------|------|
| 1            | 3-(2-Hydroxyethyl) indole               | 161.08           | C00955  | 0.15 | 0.01            | 2.14 |
| 2            | Pantetheine                             | 278.13           | C00831  | 0.17 | 0.00            | 2.49 |
| 3            | (+/-)11(12)-EET                         | 320.24           | C14770  | 0.22 | 0.02            | 2.33 |
| 4            | L-Saccharopine                          | 276.13           | C00449  | 0.29 | 0.04            | 1.24 |
| 5            | 1-Palmitoyl-Sn-Glycero-3-Phosphocholine | 495.33           | C04230  | 0.30 | 0.02            | 2.40 |
| 6            | L-Homocitrulline                        | 189.11           | C02427  | 0.30 | 0.00            | 2.38 |
| 7            | Sphinganine                             | 301.30           | C00836  | 0.37 | 0.01            | 2.92 |
| 8            | 1-Methylguanosine                       | 297.11           | C04545  | 0.38 | 0.02            | 1.33 |
| 9            | Choline Glycerophosphate                | 257.10           | C00670  | 0.38 | 0.02            | 2.10 |
| 10           | Arachidonic acid                        | 304.24           | C00219  | 0.39 | 0.01            | 2.20 |
| 11           | Cyclohexylsulfamate                     | 179.06           | C02824  | 0.40 | 0.00            | 2.22 |
| 12           | 5-oxoproline                            | 129.04           | C01879  | 0.43 | 0.00            | 1.53 |
| 13           | 3-Succinoylpyridine                     | 179.06           | C19569  | 0.44 | 0.01            | 1.50 |
| 14           | cis-5,8,11,14,17-Eicosapentaenoic acid  | 302.22           | C06428  | 0.44 | 0.00            | 2.21 |
| 15           | Cytidine                                | 243.09           | C00475  | 0.47 | 0.03            | 1.96 |
| 16           | Fumaric acid                            | 116.01           | C00122  | 0.48 | 0.02            | 1.66 |
| 17           | Pimelic acid                            | 114.07           | C02656  | 0.48 | 0.02            | 1.73 |
| 18           | DL-Malic acid                           | 134.02           | C03668  | 0.48 | 0.01            | 1.68 |
| 19           | 4-Oxoretinol                            | 300.21           | C16683  | 0.49 | 0.01            | 1.57 |
| 20           | Guanine                                 | 151.05           | C00242  | 0.49 | 0.01            | 2.14 |

| Order Number | Name                        | Molecular Weight | KEGG_ID | FC   | <i>p</i> -value | VIP  |
|--------------|-----------------------------|------------------|---------|------|-----------------|------|
| 21           | 2'-Deoxyadenosine           | 273.08           | C00559  | 0.49 | 0.03            | 1.08 |
| 22           | Stearic acid                | 284.27           | C01530  | 0.50 | 0.00            | 2.43 |
| 23           | Saxitoxin                   | 281.12           | C13757  | 2.04 | 0.03            | 1.10 |
| 24           | 4-Hydroxyphenylpyruvic acid | 180.04           | C01179  | 2.17 | 0.04            | 2.14 |
| 25           | 12-Hydroxydodecanoic acid   | 216.17           | C08317  | 2.21 | 0.02            | 1.41 |
| 26           | Ergocalciferol              | 396.34           | C05441  | 2.35 | 0.02            | 1.60 |
| 27           | Isophorone                  | 138.10           | C14743  | 2.52 | 0.01            | 1.25 |
| 28           | DL-Norvaline                | 117.08           | C01799  | 2.67 | 0.03            | 1.93 |

Metabolites with KEGG\_ID are shown in this table, and those without KEGG\_ID are not marked. VIP > 1.0, |FC| > 2, *p*-value < 0.05.
